# Supplementary material
Source: PubMed Central journal article supplement (PMC6159871)
Supplement: NIHMS77918-supplement-Supplementary_Figure_S1.pdf [file NIHMS77918-supplement-Supplementary_Figure_S1.pdf]

Supplementary Figure S1 Consort diagram to show participant flow through the trial

190x275mm (96 x 96 DPI)
